# Supplementary material
Source: PubMed Central journal article supplement (PMC2111619)
Supplement: annrheumd_ard.2006.068528_1.pdf [file annrheumd_ard.2006.068528_1.pdf]

| The name of primers | Sequences of primer pairs                                                                                          |
|---------------------|--------------------------------------------------------------------------------------------------------------------|
| rs1041981           | F15' GCA TCT TGC CCA CAG CA <u>C</u> 3',F2 5' GCA TCT AGC CCA CAG CA <u>A</u> 3'<br>R5'TCC CAG AGA AGA CCA CCT G3' |
| rs1799724           | F15'GCAAAGGAGAAGCTGAGAAGATG-3',F25'-GTATCGGGGACCCCCC <u>G</u> TTAA3'<br>R5'GTGGGGGTAGCAGGGACAAG3'                  |
| rs224660            | F5'CTC CTC CAG GGT CGT CC3',R5' AAC AGA GCT ATC TCA GCA G <u>A</u> G C3'                                           |
| rs2071592           | F5'GAA ATG GCG CAA GCA GAG A <u>A</u> G C3',R5'TCT TTT CGT CCA TCA CTG AAC C3'                                     |
| rs929138            | F5'TTG GCA ATT CTA TAT GGT <u>C</u> AG CT3',R5'GCC AGC CTT CAG CAG ACT AC3'                                        |
| rs2284178           | F5'GAG AAG TGC AAA ATC CCA CGA C3',R 5'CAC TGG TCC TAT CAC CAT CTG C3'                                             |
| rs909253            | F5'ACT ACC GCC CAG CAG TGT3',R5'GAC AGA CCT CCC GCC CT3'                                                           |
| rs2256965           | F5'GCT CAG GGT TGG CAC ATA AG3',R5' CCA TTC CTT CTC CAG CGT3'                                                      |
| rs2736191           | F5'GAA TGG GTG GGA TGG GTC3',R5' GGA GGG TGG GGC TTA GAT G3'                                                       |
| rs2857697           | F5'CCA GTT CTT TCA TTC ATC TAC CCA3',R5' AGT GAC CTA TGC TAT TGT GCC T3'                                           |
| rs3117583           | F5'TTC ACC AAC ACC TCC AAG3',R5' CCA CCT CTC GTC CTC CA3'                                                          |
