# Supplementary material
Source: PubMed Central journal article supplement (PMC2111619)
Supplement: annrheumd_ard.2006.068528_2.pdf [file annrheumd_ard.2006.068528_2.pdf]

## **Applying Bonferroni and other methods to correction**

Bonferroni correction is an effective statistical method to reduce falsely significance for multiple comparisons. We applied the method to evaluate the significance level of our previous 3 times research results, adjusted by Bonferroni correction, the significance level was  $0.017(0.05/3)$ , a little lower ( $p=0.004$ ) than that in this study ( $p=0.021$ ), and more than those in our previous studies ( $p<0.001$ ). Because of the high stringency of the Bonferroni correction, we also analysed the significance level of our datasets to correct them by the other three methods. Such as: (1) by the first method used from Legendre in 1988, we got the value of the significance level ( $p= 0.021$ ) [Legendre P. & Legendre L (1998). *Numerical Ecology (2nd English Edition)*. Elsevier, Amsterdam.]. Throughout the second method, the Bonferroni step-down (Holm) correction, we got the same result ( $p=0.021$ ) [Holm, S (1979). *A simple sequentially rejective multiple test procedure. Scandinavian Journal of Statistics*, 6: 65-70.]. The third method is the permuted correction, by Haploview software 3.32 with 3000 times permutation, and the result of the significance level is  $p=0.049$ . We evaluated the significance level by 4 methods, including the Bonferroni correction. Nearly all analysis results support our study and the evidences from biologic studies of TNF- $\alpha$  support that the SNP variance is associated with AS.
