# Supplementary material
Source: PubMed Central journal article supplement (PMC2111619)
Supplement: annrheumd_ard.2006.068528_4.pdf [file annrheumd_ard.2006.068528_4.pdf]

Supplementary Table 1: Comparing between cases with *TNF- $\alpha$*  -850 mutant rate and OR in HLA-B27 negative and HLA-B27 positive groups

|                       | <i>TNF-<math>\alpha</math></i> -850 C/T(%) |           |
|-----------------------|--------------------------------------------|-----------|
|                       | <i>TX (TT+CT)</i>                          | <i>CC</i> |
| HLA-B27 negative case | 5 (62.5)                                   | 3 (37.5)  |
| HLA-B27 positive case | 34 (47.9)                                  | 37 (52.1) |
| $\chi^2$              | 0.61                                       |           |
| <i>P</i>              | 0.43                                       |           |
| OR                    | 1.81                                       |           |
| 95% CI                | 0.40-19.95                                 |           |
