# Supplementary material
Source: PubMed Central journal article supplement (PMC2111619)
Supplement: annrheumd_ard.2006.068528_5.pdf [file annrheumd_ard.2006.068528_5.pdf]

Supplementary Table 2: Comparing *TNF- $\alpha$*  -850 mutant rate and OR value between case-control groups with HLA-B27 negative.

|                          | <i>TNF-<math>\alpha</math></i> -850 C/T(%) |            |
|--------------------------|--------------------------------------------|------------|
|                          | <i>TX (TT+CT)</i>                          | <i>CC</i>  |
| HLA-B27 negative case    | 5 (62.5)                                   | 3 (37.5)   |
| HLA-B27 negative control | 40 (31.7)                                  | 86 (68.3)  |
| $\chi^2$                 |                                            | 3.19       |
| <i>P</i>                 |                                            | 0.07       |
| OR                       |                                            | 3.85       |
| 95% CI                   |                                            | 0.82-32.68 |
