# Supplementary material
Source: PubMed Central journal article supplement (PMC2111619)
Supplement: annrheumd_ard.2006.068528_6.pdf [file annrheumd_ard.2006.068528_6.pdf]

Supplementary Table 3: Comparing *TNF- $\alpha$ -850* mutant rate and OR value between case-control groups with HLA-B27 positive.

|                          | <i>TNF-<math>\alpha</math>-850</i> C/T(%) |           |
|--------------------------|-------------------------------------------|-----------|
|                          | <i>TX (TT+CT)</i>                         | <i>CC</i> |
| HLA-B27 positive case    | 34 (47.9)                                 | 37 (52.1) |
| HLA-B27 positive control | 4 (66.7)                                  | 2 (33.3)  |
| $\chi^2$                 |                                           | 0.78      |
| <i>P</i>                 |                                           | 0.38      |
| OR                       |                                           | 0.46      |
| 95% CI                   |                                           | 0.08-7.12 |

### Mini-discussion

We recounted these cases with *TNF- $\alpha$ -850* mutant and wild type in HLA-B27 negative and HLA-B27 positive groups separately, and analyzed by chi-square and Odds Ratio detection, see the supplementary table 1, as follow; the cases with *TNF- $\alpha$ -850* mutant in HLA-B27 negative cases (62.5%), show a higher *TNF- $\alpha$ -850* mutant frequency compared with that in the B27 positive cases (47.9%). We could not give significant difference between them, but we indicated a trend of higher risk of AS cases with *TNF- $\alpha$ -850* mutant and HLA-B27 negative than these with *TNF- $\alpha$ -850* wild and HLA-B27 positive. Then, we counted also individuals with *TNF- $\alpha$ -850* mutant and wild type in HLA-B27 negative case-control groups separately and did the same analysis by case and control design, seeing the supplementary table 2. The rate (62.5%) of *TNF- $\alpha$ -850* mutant in HLA-B27 negative cases group was higher than that (31.7%) of control group. The rate difference between both groups was 30.8% about 2 fold higher and OR was 3.58 (95%CI: 0.82-32.68;  $\chi^2$ :3.190;  $P=0.07$ ) in case group. But we could not see any difference between case and control with HLA-B27 positive groups, seeing the supplementary table 3. Considering the *TNF- $\alpha$ -850* mutant carrier results analyzed by stratification mentioned-above based on HLA-B27 in case-case and case-control groups separately, perhaps, it suggested that detecting the risk of AS be meaningful only for ones with *TNF- $\alpha$ -850* mutant and HLA-B27 negative carriers. It was also possible cause for the less sample size of AS cases with *TNF- $\alpha$ -850* mutant and HLA-B27 negative to be hard to achieve a significant level in statistics analysis.
